# Supplementary material
Source: publisher figshare collection journal article supplement (https://sage.figshare.com/ndownloader/files/15460259)
Supplement: Supplementary file 1 [file 15460259]

**Figure A1.**

Employment. Distributed fixed effects estimates with 95% confidence intervals, ten years before and after marriage. Individuals of African origins, marrying endogamously in Norway between 1993 and 2010.

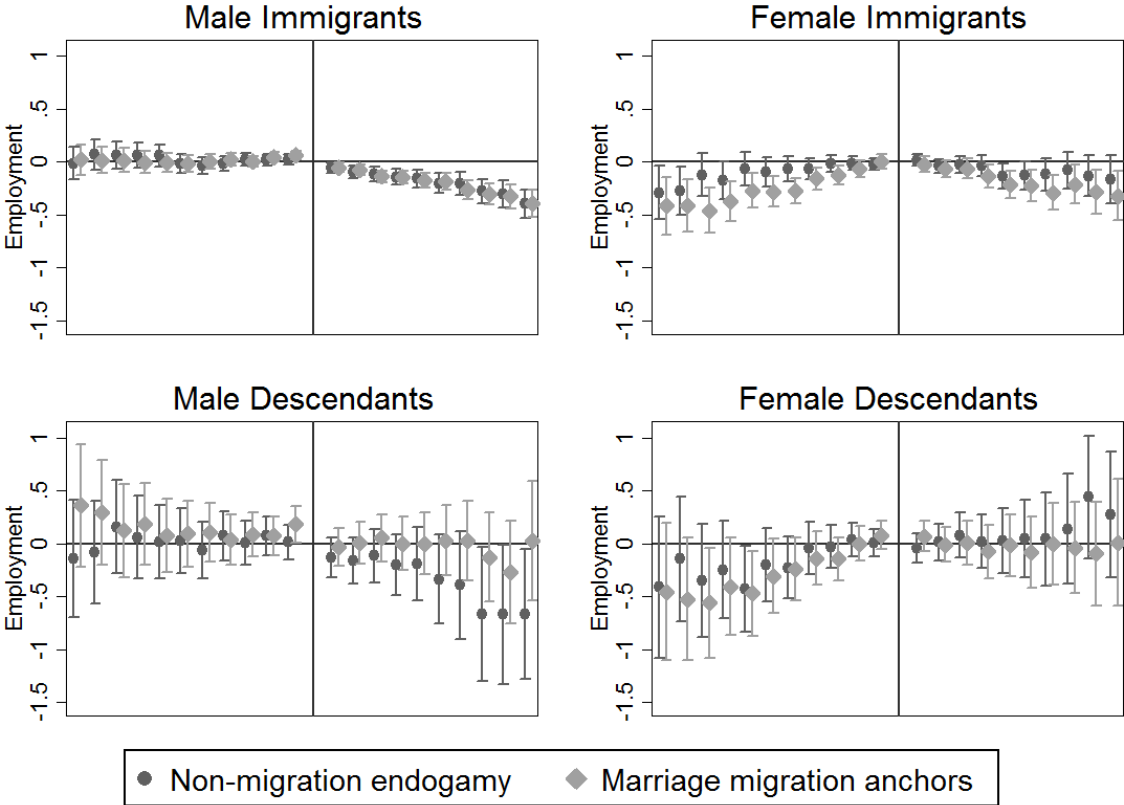

Source: Author's calculations based on administrative registry data from Statistics Norway. Each coefficient represents a percentage point difference in probability of being employed compared to the year of marriage within each model. All models include controls for age and age squared, duration of residence (4 categories), and county of residence (20 categories). Full results of parameter estimates, standard errors and fit statistics available upon request.

**Figure A2.**

Employment. Distributed fixed effects estimates with 95% confidence intervals, ten years before and after marriage. Individuals of Central and Western Asian origins, marrying endogamously in Norway between 1993 and 2010.

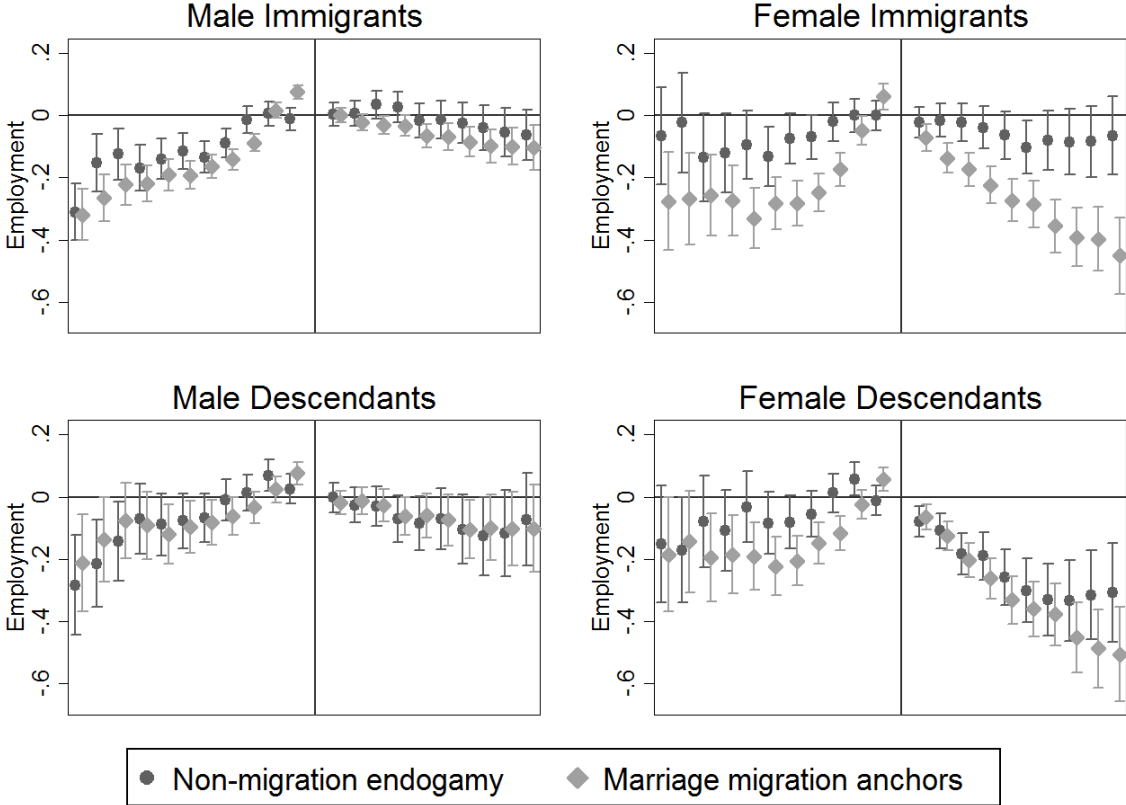

Source: Author's calculations based on administrative registry data from Statistics Norway. Each coefficient represents a percentage point difference in probability of being employed compared to the year of marriage within each model. All models include controls for age and age squared, duration of residence (4 categories), and county of residence (20 categories). Full results of parameter estimates, standard errors and fit statistics available upon request.

**Figure A3.**

Employment. Distributed fixed effects estimates with 95% confidence intervals, ten years before and after marriage. Individuals of Southern and Eastern Asian origins, marrying endogamously in Norway between 1993 and 2010.

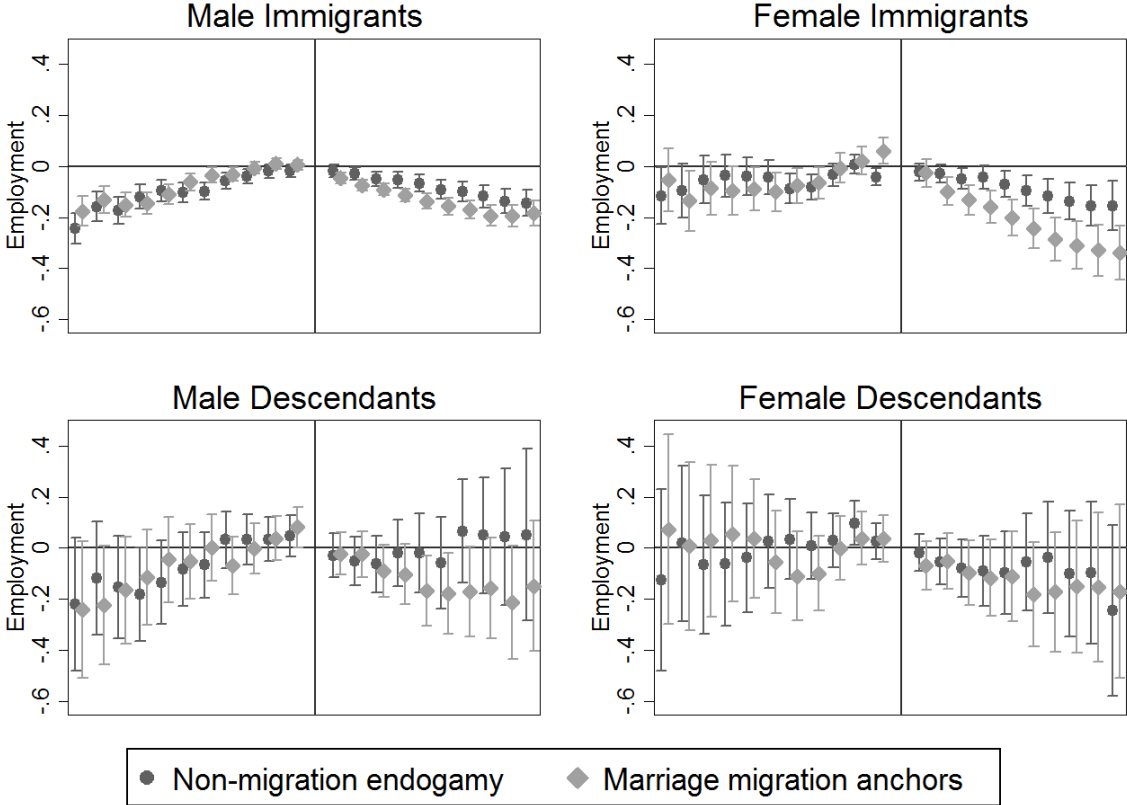

Source: Author's calculations based on administrative registry data from Statistics Norway. Each coefficient represents a percentage point difference in probability of being employed compared to the year of marriage within each model. All models include controls for age and age squared, duration of residence (4 categories), and county of residence (20 categories). Full results of parameter estimates, standard errors and fit statistics available upon request.

**Figure A4.**

Employment. Distributed fixed effects estimates with 95% confidence intervals, ten years before and after marriage. Individuals of Eastern European origins, marrying endogamously in Norway between 1993 and 2010.

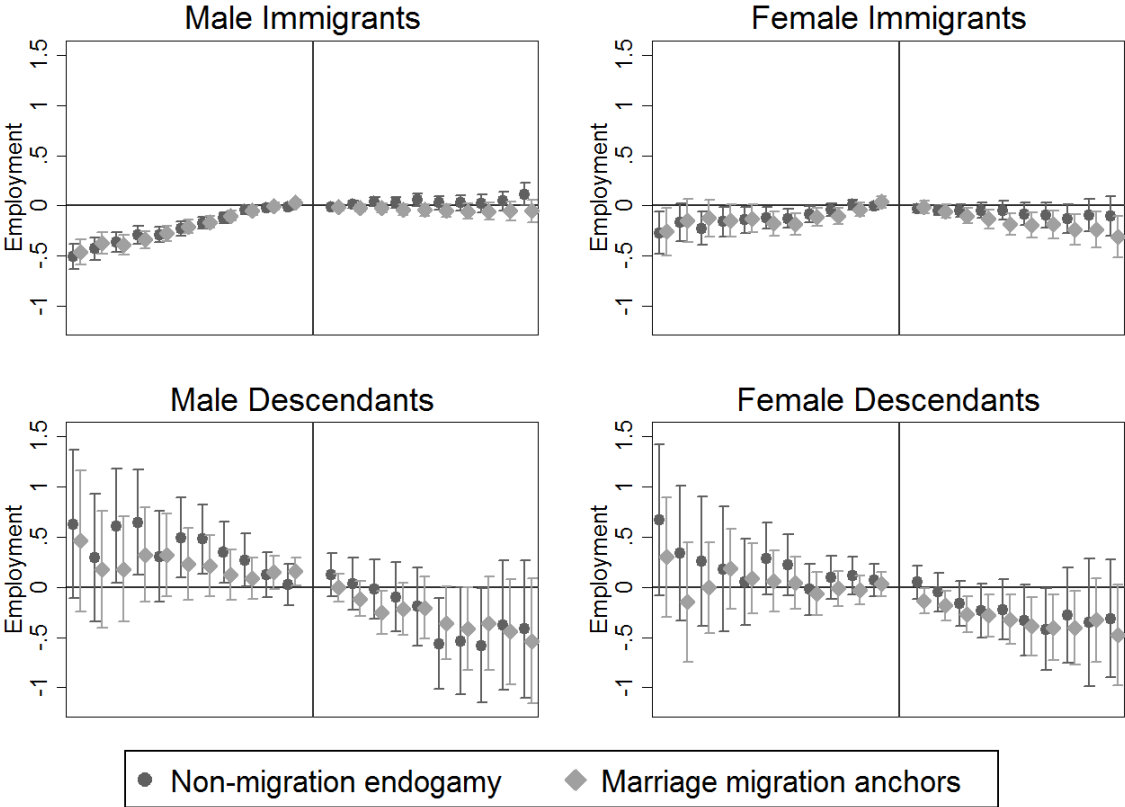

*Source:* Author's calculations based on administrative registry data from Statistics Norway. Each coefficient represents a percentage point difference in probability of being employed compared to the year of marriage within each model. All models include controls for age and age squared, duration of residence (4 categories), and county of residence (20 categories). Full results of parameter estimates, standard errors and fit statistics available upon request.

**Figure A5.**

Labor earnings. Distributed fixed effects estimates with 95% confidence intervals, ten years before and after marriage. Individuals of African origins, marrying endogamously in Norway between 1993 and 2010.

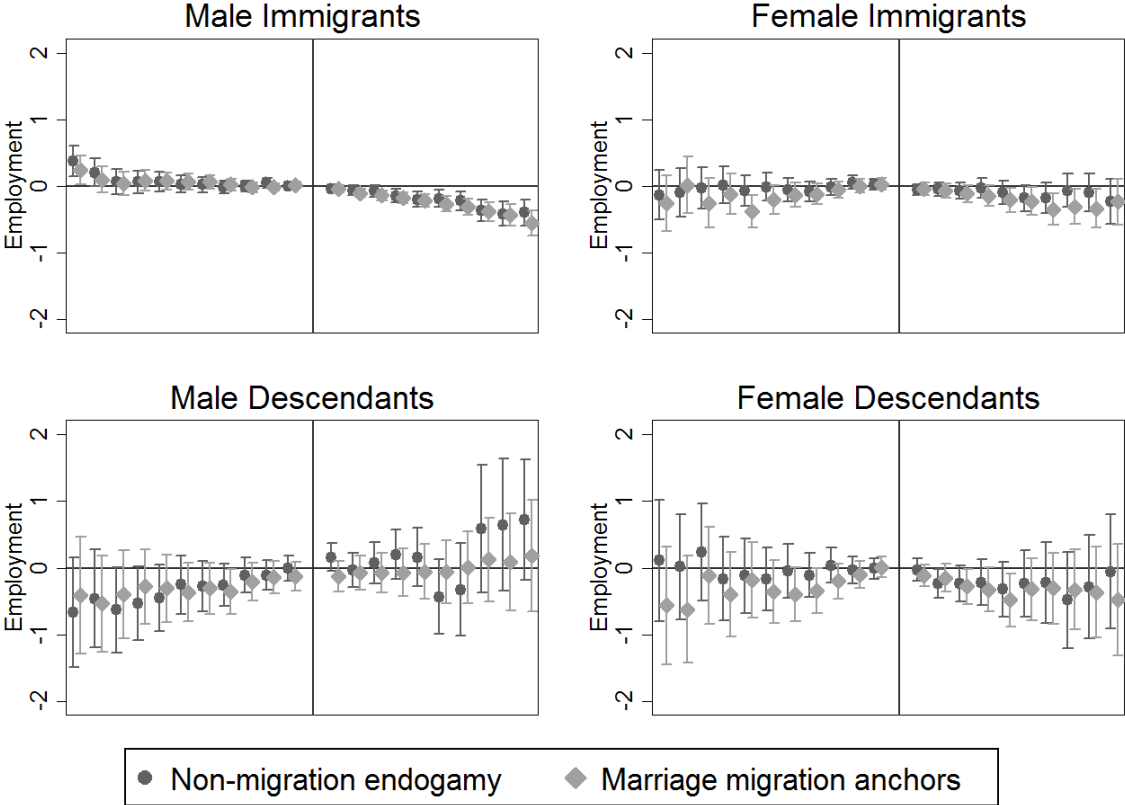

Source: Author's calculations based on administrative registry data from Statistics Norway. Each coefficient approximates a percentage change in labor earnings compared to the year of marriage within each model. All models include controls for age and age squared, duration of residence (4 categories), and county of residence (20 categories). Full results of parameter estimates, standard errors and fit statistics available upon request.

**Figure A6.**

Labor earnings. Distributed fixed effects estimates with 95% confidence intervals, ten years before and after marriage. Individuals of Central and Western Asian origins, marrying endogamously in Norway between 1993 and 2010.

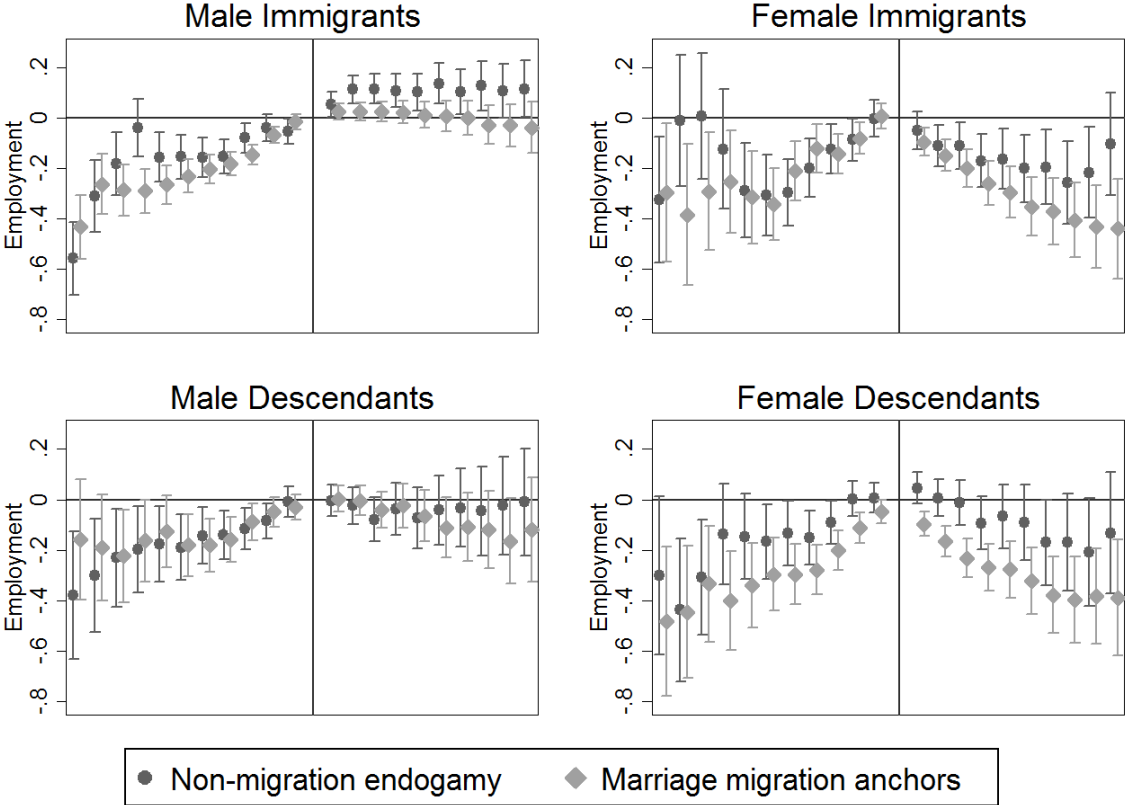

Source: Author's calculations based on administrative registry data from Statistics Norway. Each coefficient approximates a percentage change in labor earnings compared to the year of marriage within each model. All models include controls for age and age squared, duration of residence (4 categories), and county of residence (20 categories). Full results of parameter estimates, standard errors and fit statistics available upon request.

**Figure A7.**

Labor earnings. Distributed fixed effects estimates with 95% confidence intervals, ten years before and after marriage. Individuals of Southern and Eastern Asian origins, marrying endogamously in Norway between 1993 and 2010.

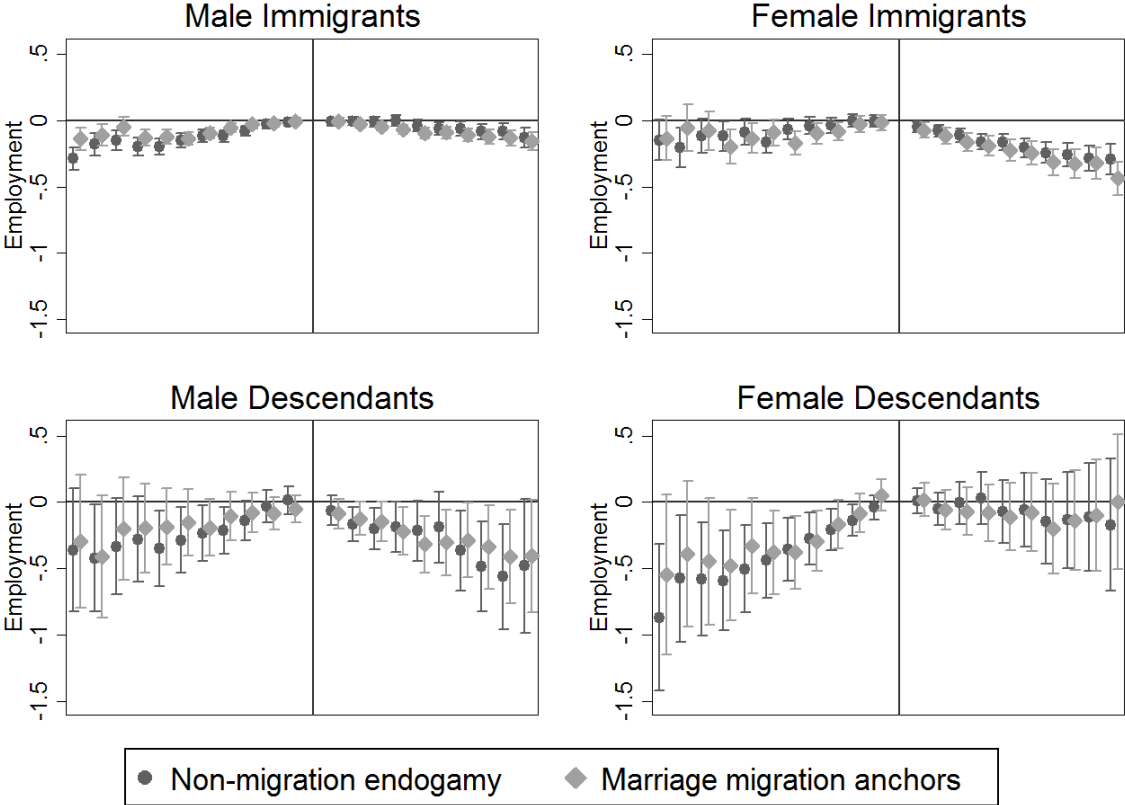

Source: Author's calculations based on administrative registry data from Statistics Norway. Each coefficient approximates a percentage change in labor earnings compared to the year of marriage within each model. All models include controls for age and age squared, duration of residence (4 categories), and county of residence (20 categories). Full results of parameter estimates, standard errors and fit statistics available upon request.

**Figure A8.**

Labor earnings. Distributed fixed effects estimates with 95% confidence intervals, ten years before and after marriage. Individuals of Eastern European origins, marrying endogamously in Norway between 1993 and 2010.

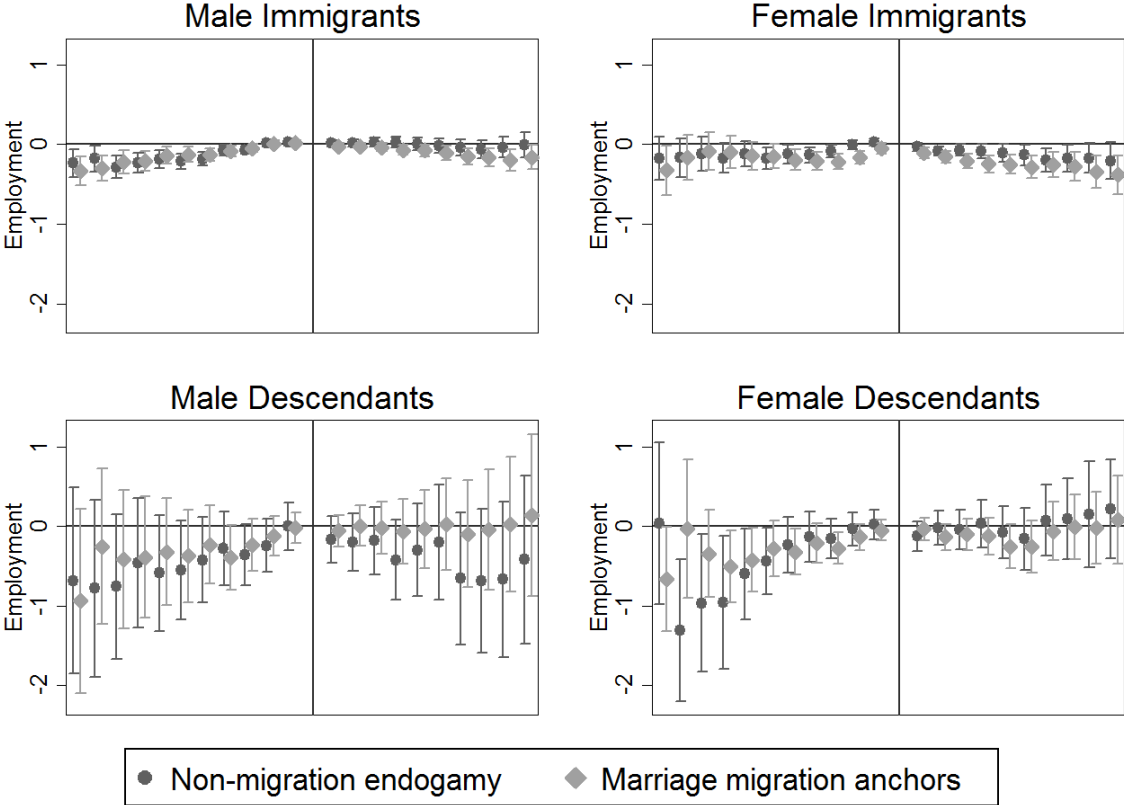

Source: Author's calculations based on administrative registry data from Statistics Norway. Each coefficient approximates a percentage change in labor earnings compared to the year of marriage within each model. All models include controls for age and age squared, duration of residence (4 categories), and county of residence (20 categories). Full results of parameter estimates, standard errors and fit statistics available upon request.
